# Supplementary material for: Variation in genome content and predatory phenotypes between Bdellovibrio sp. NC01 isolated from soil and B. bacteriovorus type strain HD100
Source: PubMed Central journal article supplement (PMC7137782; doi:10.1099/mic.0.000861), 2019-10-08

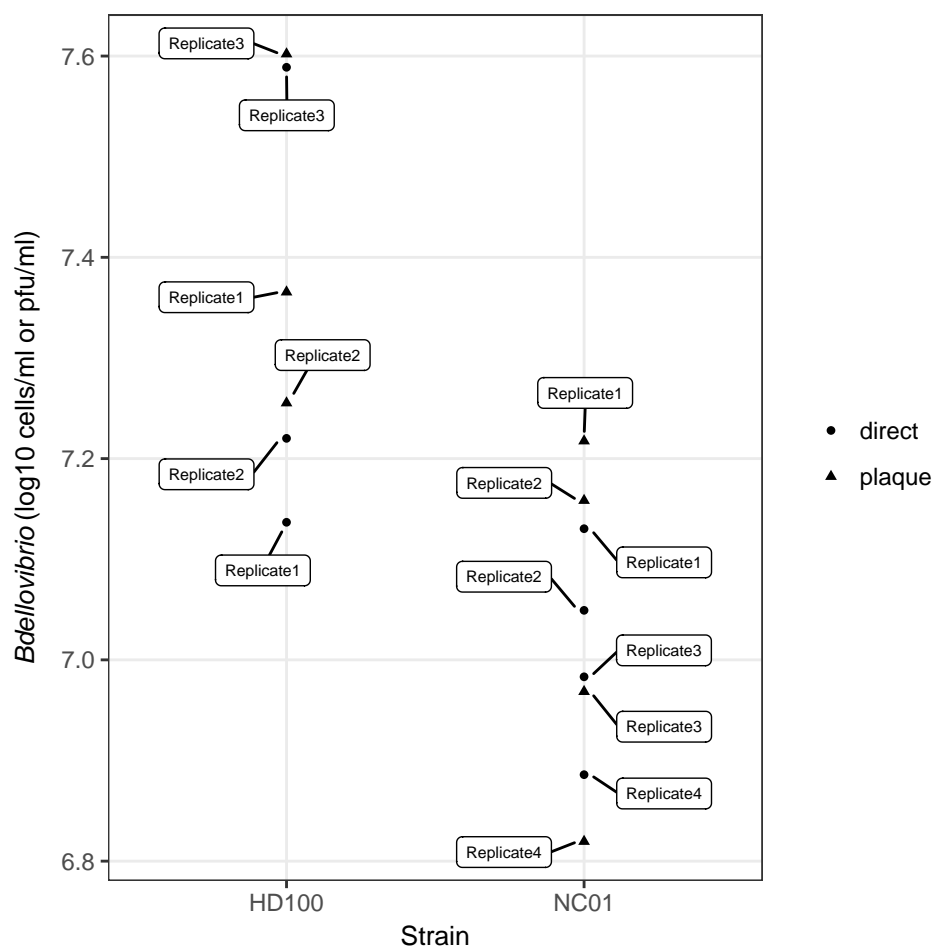

Supplement: mic-165-1315-s002.pdf [file mic-165-1315-s002.pdf]
